# Supplementary material
Source: PubMed Central journal article supplement (PMC2543051)

Supplementary Figure 1. (Y. Imai *et. al*)

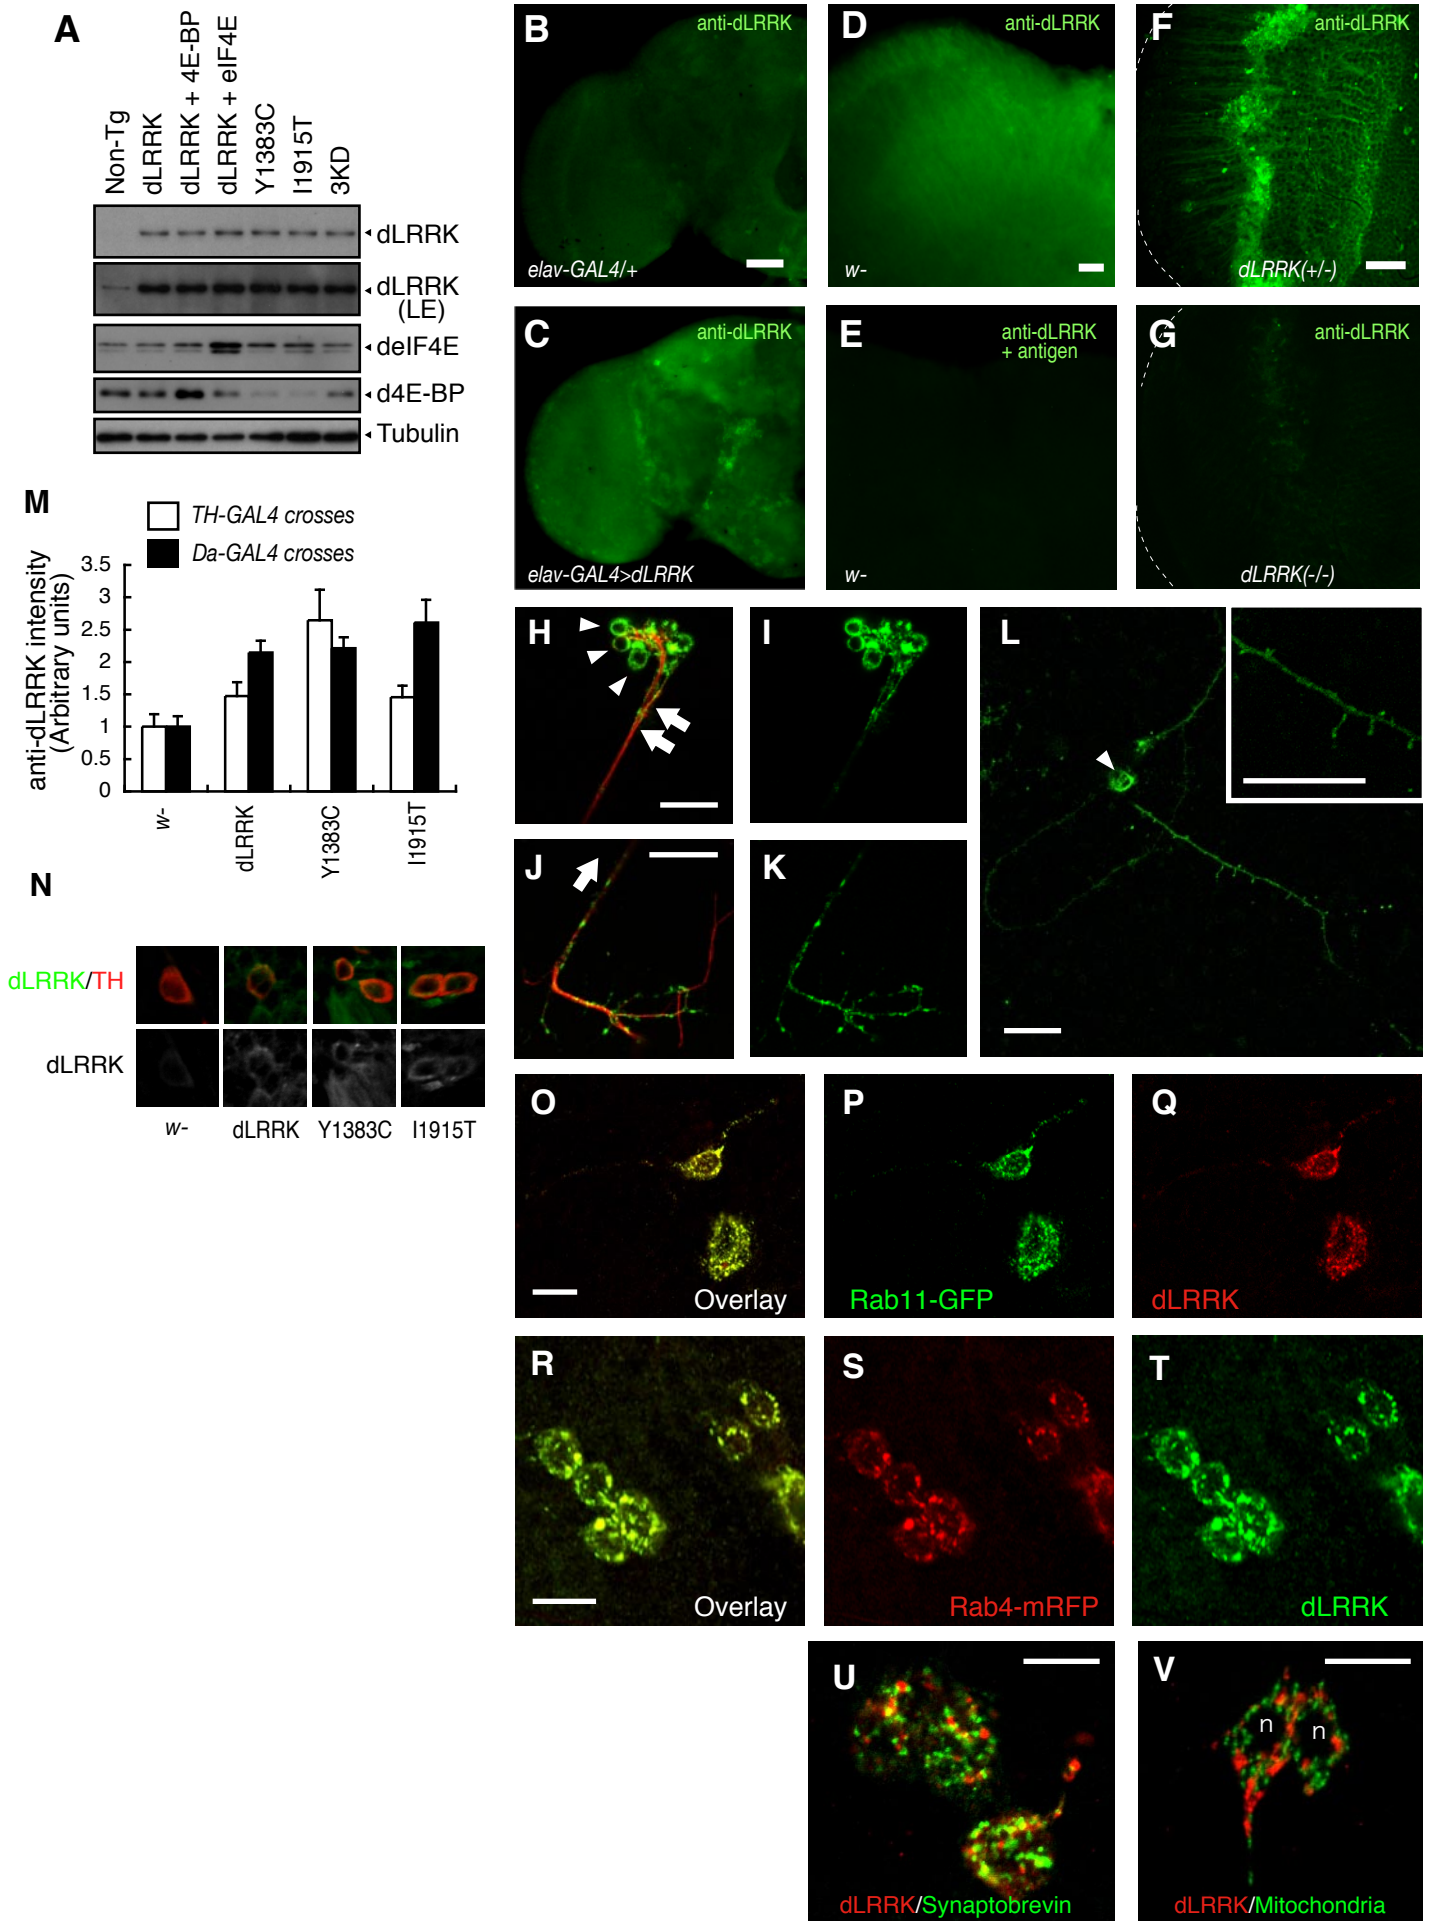

Supplementary Figure 2. (Y. Imai *et. al*)

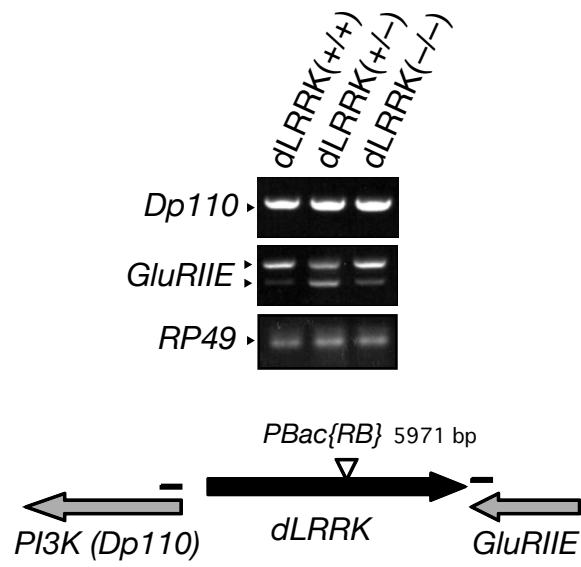

Supplementary Figure 3. (Y. Imai *et. al*)

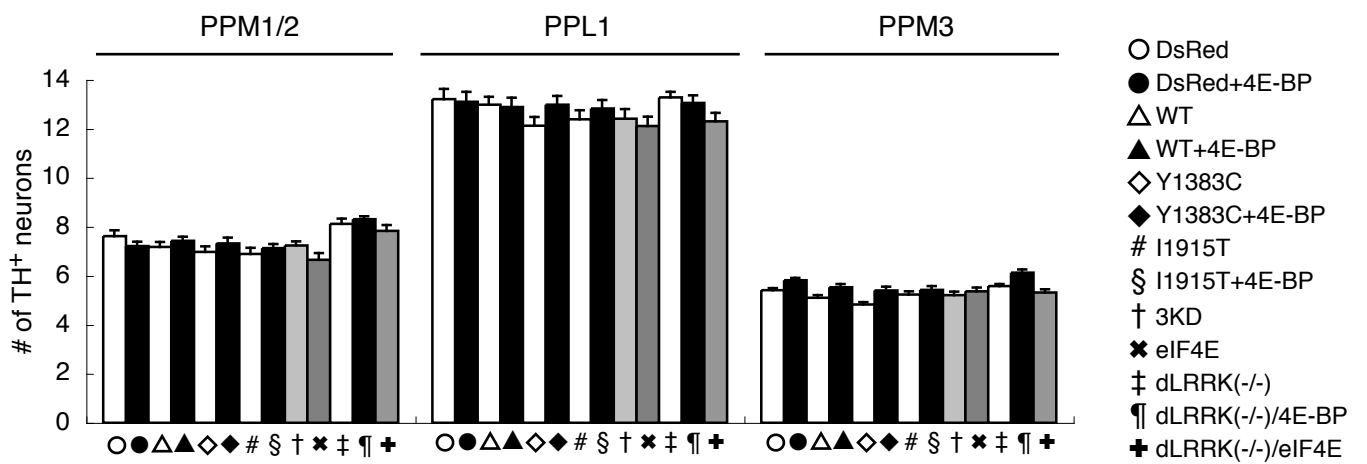

Supplementary Figure 4. (Y. Imai *et. al*)

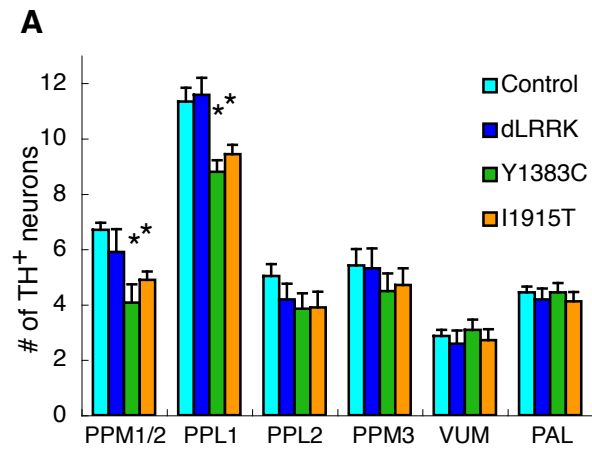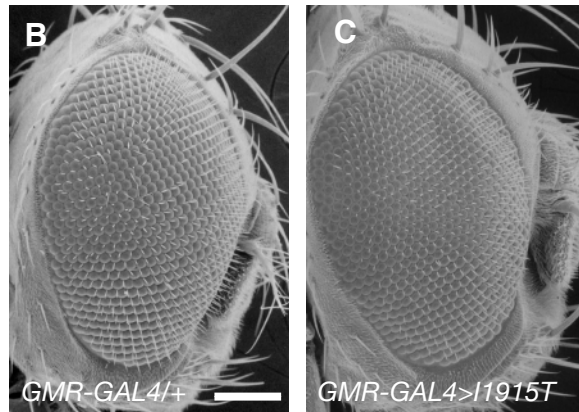

Supplementary Figure 5. (Y. Imai *et. al*)

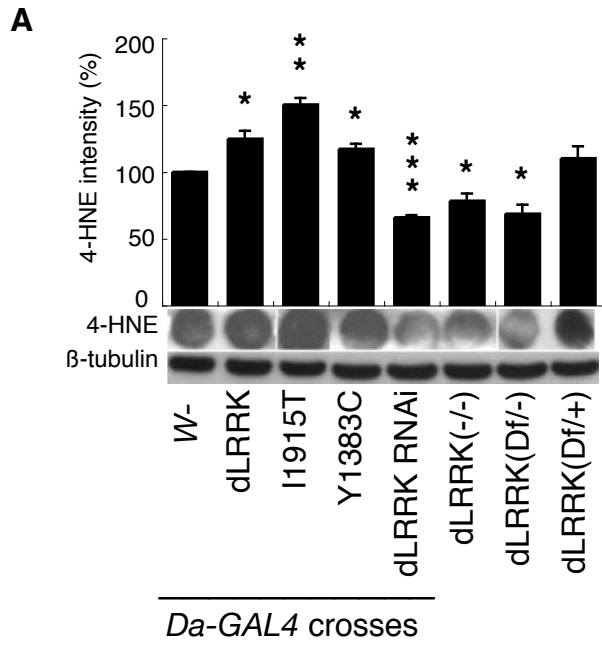

**B**

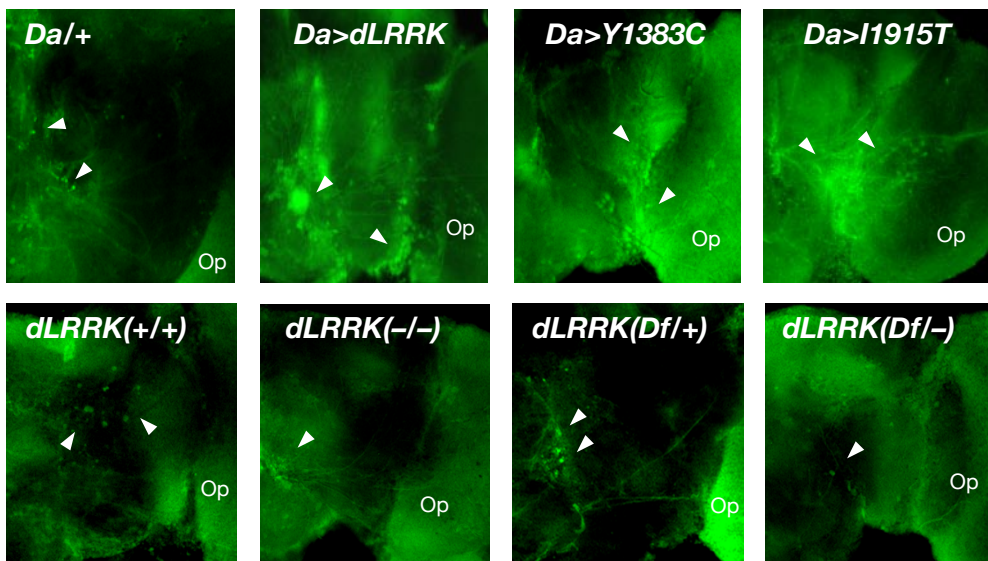

Supplementary Figure 6. (Y. Imai et. al)

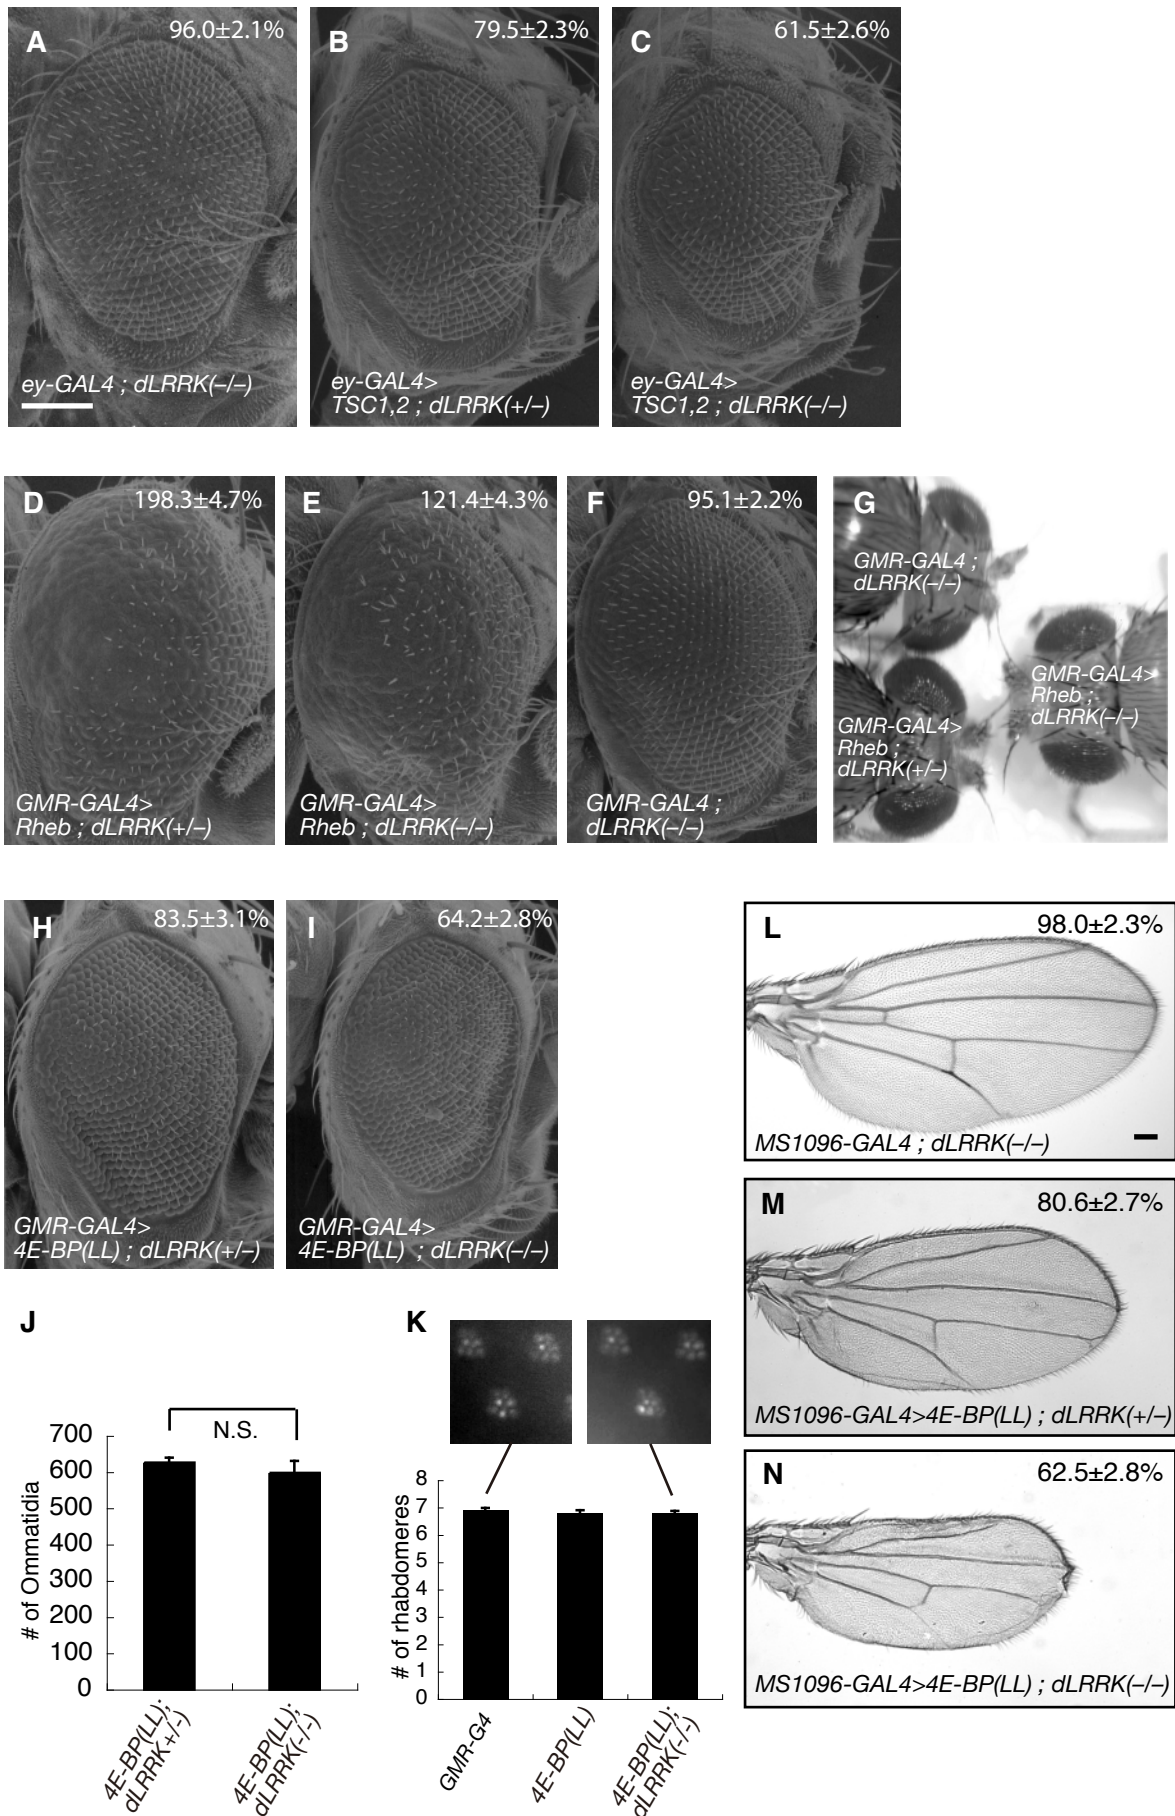



Supplementary Figure 7. (Y. Imai *et. al*)

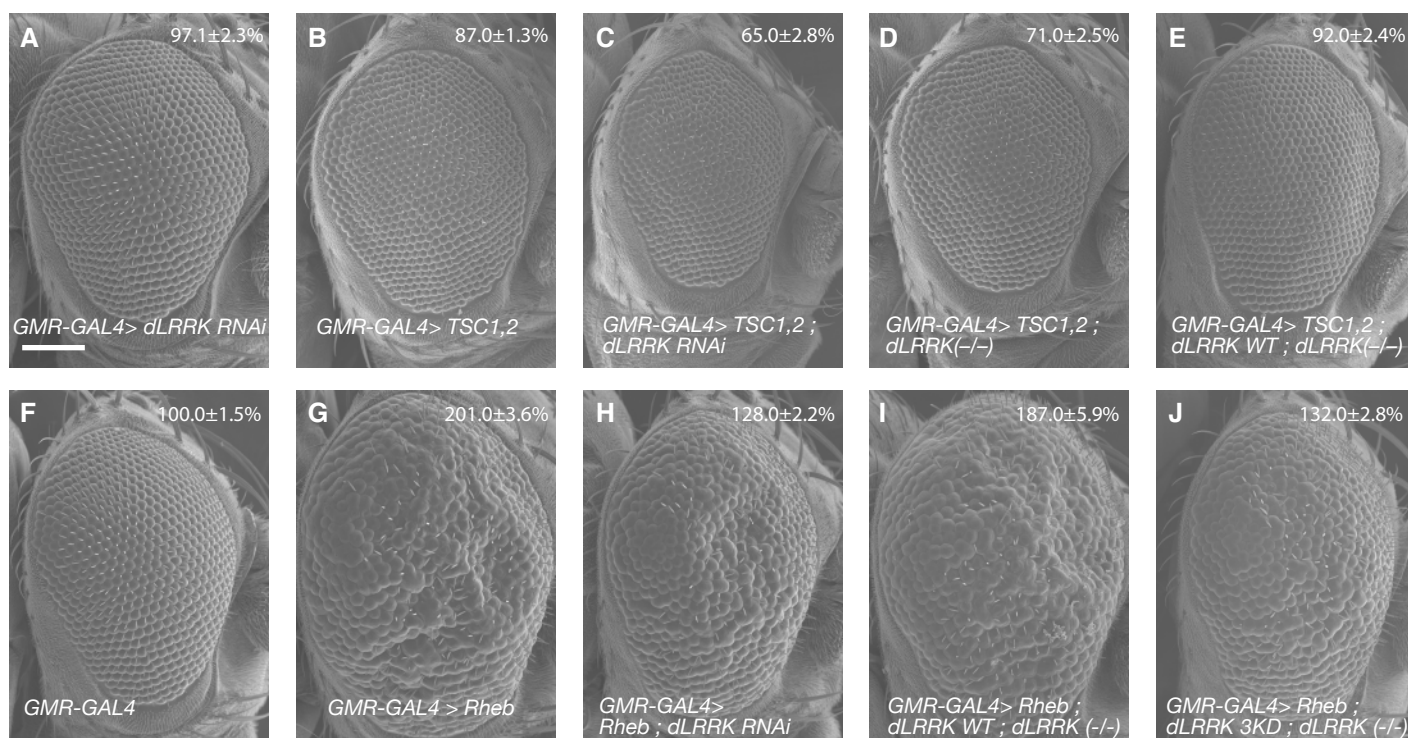

Supplementary Figure 8. (Y. Imai *et. al* )

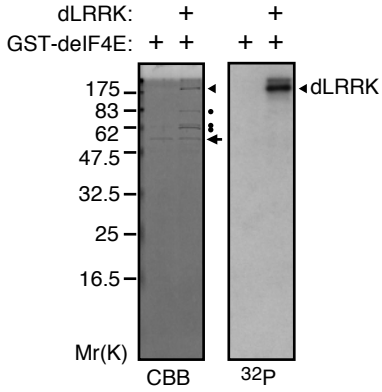



Supplementary Figure 9. (Y. Imai *et. al* )

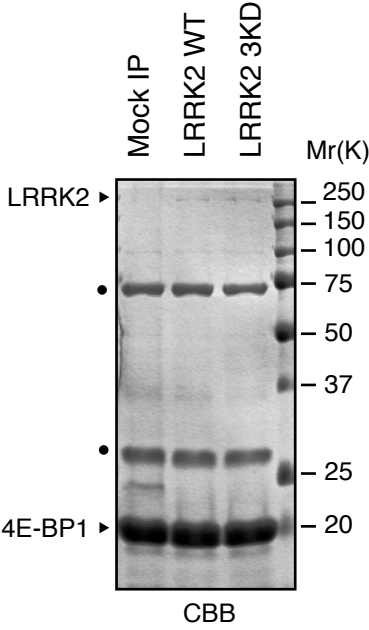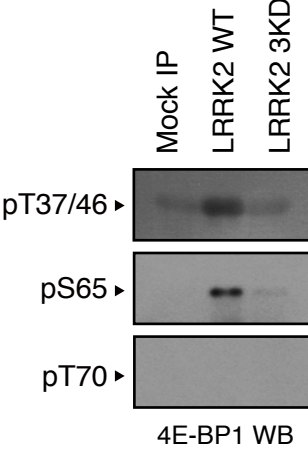

Supplementary Figure 10. (Y. Imai *et. al* )

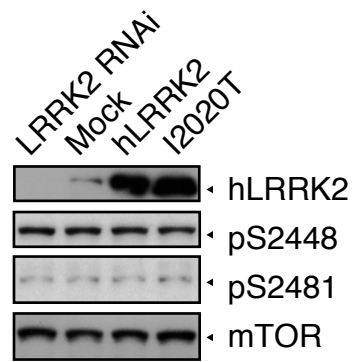

Supplementary Figure 11. (Y. Imai *et. al*)

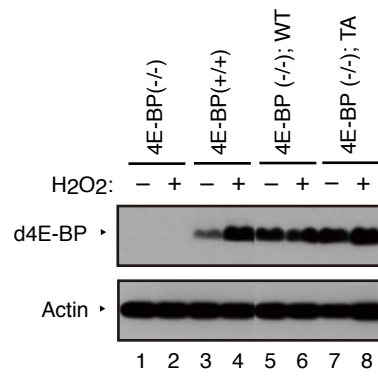

Supplementary Figure 12. (Y. Imai *et. al*)

**A**

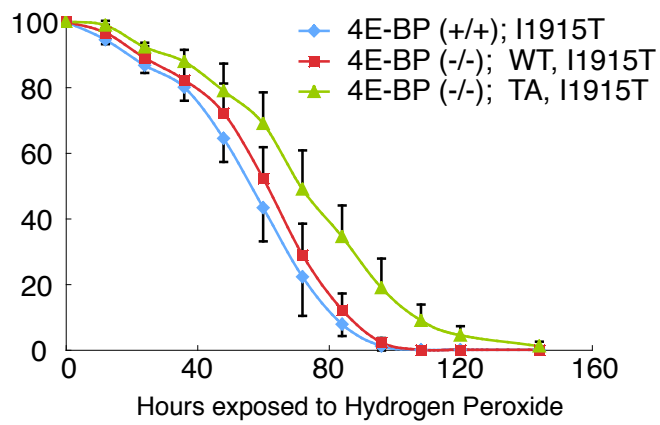

**B**

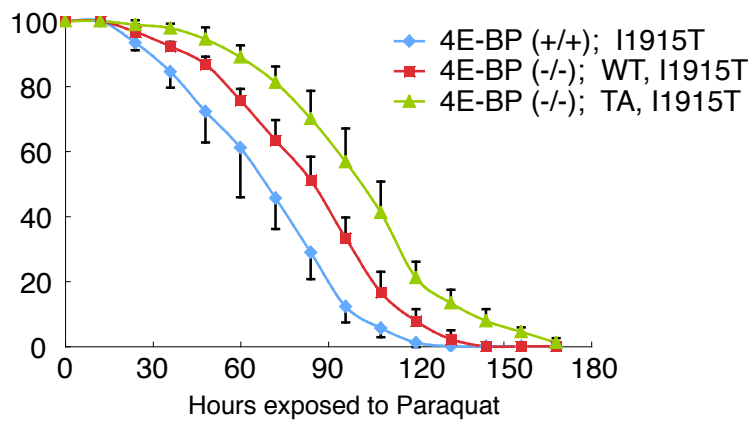

Supplement: emboj2008163s3.pdf [file emboj2008163s3.pdf]
